# Supplementary material
Source: PubMed Central journal article supplement (PMC9175307)
Supplement: NIHMS1808366-supplement-Supplemental_Information.pdf [file NIHMS1808366-supplement-Supplemental_Information.pdf]

# Free Energies of Proton-Coupled Electron Transfer Reagents and Their Applications

Rishi G. Agarwal<sup>\*,1</sup>, Scott C. Coste,<sup>†,1</sup> Benjamin D. Groff,<sup>†,1</sup>  
Abigail M. Heuer,<sup>†,1</sup> Hyunho Noh,<sup>†,1</sup> Giovanni A. Parada,<sup>†,1,2</sup>, Catherine F. Wise,<sup>1</sup>  
Eva M. Nichols,<sup>3</sup> Jeffrey J. Warren,<sup>4</sup> and James M. Mayer<sup>\*,1</sup>

<sup>1</sup> Department of Chemistry, Yale University, New Haven, Connecticut 06520, United States

<sup>2</sup> Department of Chemistry, The College of New Jersey, Ewing, NJ 08628, United States

<sup>3</sup> Department of Chemistry, University of British Columbia, Vancouver, BC, Canada V6T 1Z1

<sup>4</sup> Department of Chemistry, Simon Fraser University, Burnaby, BC, Canada V5A 1S6

## Table of Contents

|     |                                                                                              |   |
|-----|----------------------------------------------------------------------------------------------|---|
| 1   | General Considerations.....                                                                  | 2 |
| 2   | UV-Vis characterization of 4-oxo-TEMPO <sup>•</sup> and TEMPO <sup>•</sup> .....             | 2 |
| 2.1 | UV-Vis spectra of pure reagents .....                                                        | 2 |
| 2.2 | Molar absorptivities ( $\epsilon$ ) of 4-oxo-TEMPO <sup>•</sup> and TEMPO <sup>•</sup> ..... | 2 |
| 3   | UV-Vis Equilibration.....                                                                    | 4 |
| 4   | Calculation of 4-oxo-TEMPO-H BDFE <sub>hex</sub> .....                                       | 5 |
| 5   | References .....                                                                             | 7 |

## 1 General Considerations

Reagents were purchased from Sigma-Aldrich or Alfa Aesar. TEMPO<sup>•</sup> and 4-oxo-TEMPO<sup>•</sup> were sublimated under vacuum prior to use. TEMPO-H was prepared as reported previously.<sup>1</sup> Hexanes (mixture of isomers, HPLC grade) were purchased from Sigma-Aldrich and dispensed from an Argon-atmosphere solvent system with alumina drying columns. All reactions were performed in a nitrogen-filled glovebox (working O<sub>2</sub> level < 5 ppm). UV–Vis spectra were collected on an Agilent Cary 60 UV–Vis or Agilent Cary 5000 UV–Vis–NIR spectrophotometer inside of a nitrogen-filled glovebox.

## 2 UV-Vis characterization of 4-oxo-TEMPO<sup>•</sup> and TEMPO<sup>•</sup>

### 2.1 UV–Vis spectra of pure reagents

Individual UV–Vis spectra were taken of 4-oxo-TEMPO<sup>•</sup> (oxo<sup>•</sup>,  $\lambda_{\text{max}} = 459 \text{ nm}$ ), TEMPO<sup>•</sup> ( $\lambda_{\text{max}} = 473 \text{ nm}$ ), and TEMPO-H in hexane. The spectra were normalized to a concentration of 40 mM and are shown overlaid in Figure S1. TEMPO-H displayed a negligible UV–Vis trace, confirming it was free from TEMPO<sup>•</sup> contamination.

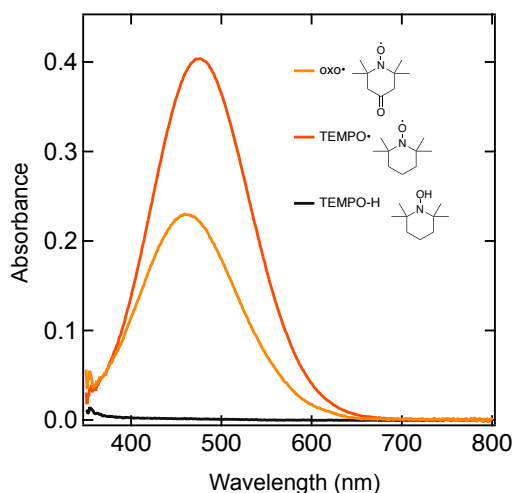

**Figure S1.** UV–Vis spectra of 40 mM oxo<sup>•</sup>, TEMPO<sup>•</sup>, and TEMPO-H in hexane.

### 2.2 Molar absorptivities ( $\epsilon$ ) of 4-oxo-TEMPO<sup>•</sup> and TEMPO<sup>•</sup>

Bear's law plots were constructed for oxo<sup>•</sup> (Figure S2a) and TEMPO<sup>•</sup> (Figure S2b) in hexane. The molar absorptivities were determined to be  $\epsilon_{459\text{nm}} = 5.86 \text{ M}^{-1} \text{ cm}^{-1}$  and  $\epsilon_{473\text{nm}} = 10.27 \text{ M}^{-1} \text{ cm}^{-1}$  for oxo<sup>•</sup> and TEMPO<sup>•</sup>, respectively. These values were in good agreement with the experimental values for  $\epsilon_{\lambda_{\text{max}}}$  when  $\epsilon$  was calculated at each wavelength (Figure S2c).

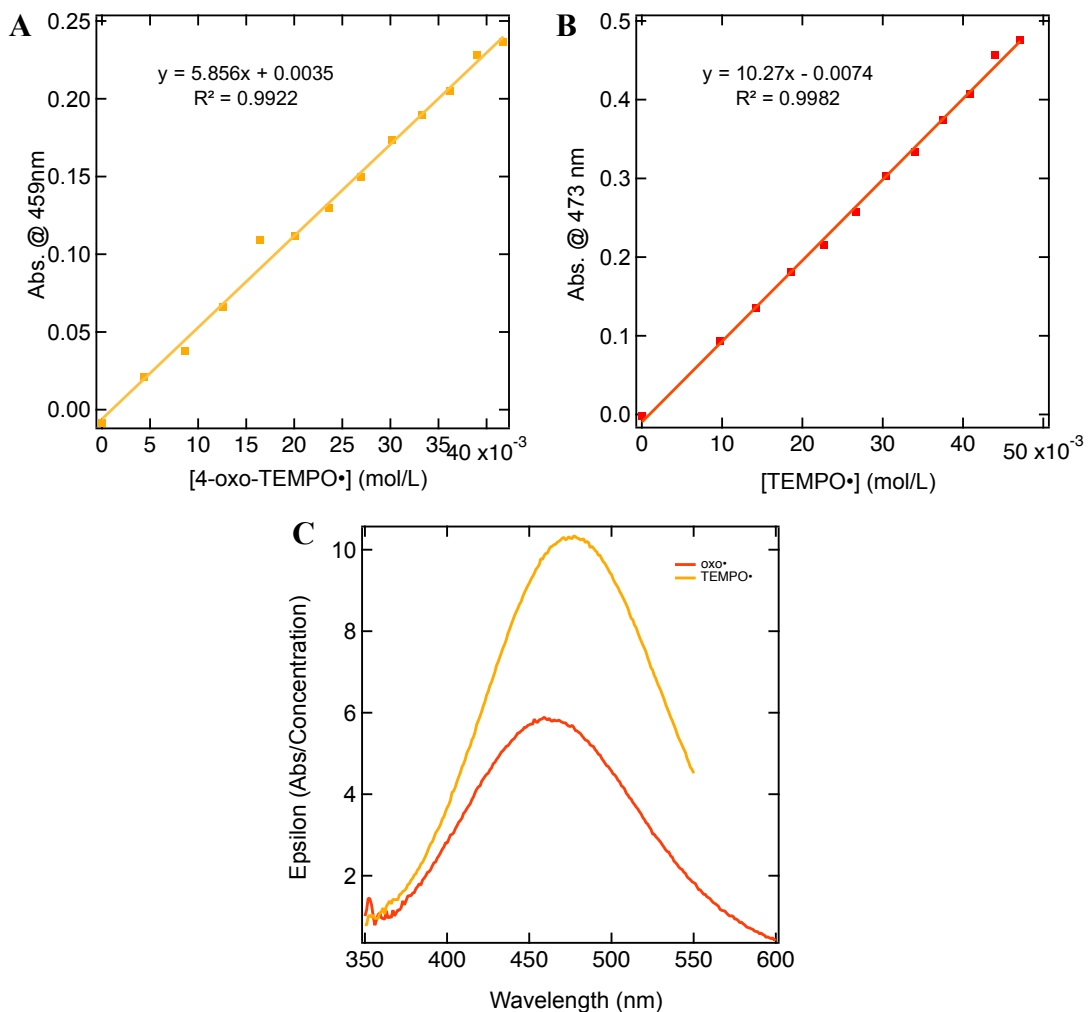

**Figure S2.** Concentration was plotted against absorbance at the  $\lambda_{\text{max}}$  for (A)  $\text{oxo}\cdot$  and (B)  $\text{TEMPO}\cdot$  in hexane. The slope of the resulting line is equal to  $\epsilon_{\lambda_{\text{max}}}$  for each species. (C) The absorbance at each wavelength was divided by concentration of the sample to provide the epsilon at each wavelength.

### 3 UV-Vis Equilibration

**Scheme 1.** Reaction between TEMPO-H and oxo•.  $K_{eq}$  of this reaction is directly related to the relative bond strength of TEMPO-H and oxo-H.

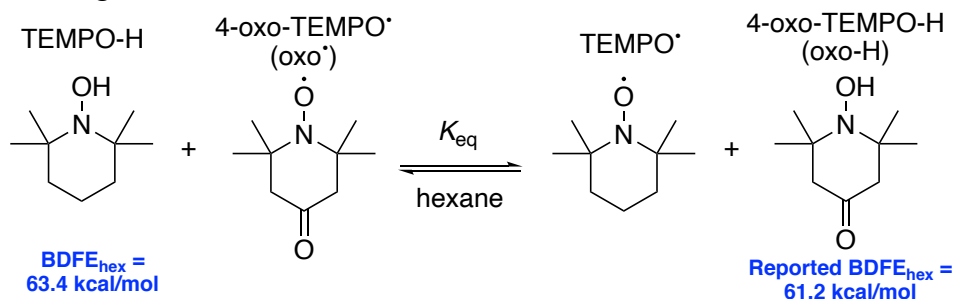

The pseudo-self exchange reaction between 4-oxo-TEMPO• (oxo•) and TEMPO-H (Scheme 1) was analyzed to determine the bond dissociation free energy (BDFE) of 4-oxo-TEMPO-H (oxo-H) in hexanes. The equilibrium constant for this reaction,  $K_{eq}$ , gives the free energy of the reaction,  $\Delta G^\circ$ . This free energy relates the BDFEs of the H-atom donor, TEMPO-H, and the H-atom receptor, oxo• (eq  $\text{X-H} + \text{Y} \rightarrow \text{X} + \text{Y-H}$   $\Delta G^\circ = \text{BDFE}(\text{XH}) - \text{BDFE}(\text{YH})$  (S1)). Utilizing the known TEMPO-H  $\text{BDFE}_{\text{hexane}} = 63.4 \text{ kcal mol}^{-1}$ , we were able to calculate the BDFE of oxo-H.

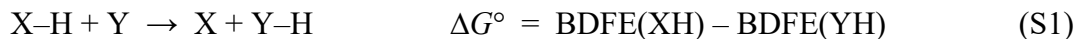

A range of experimental initial concentrations were chosen for the equilibration reaction, ranging from 1:0.33 – 1:1.2 oxo•:TEMPO-H (Table S1). A 2mL solution of 30 mM oxo• in hexanes was prepared in a quartz cuvette equipped with a stir bar. TEMPO-H stock solution in hexane (0.1933 M) was titrated incrementally across the range of oxo•:TEMPO-H molar ratios. After each TEMPO-H addition, the reaction was equilibrated with stirring for 20 min until the UV-Vis trace was constant. Sequential addition of TEMPO-H stock solution and subsequent equilibration resulted in seven experimental equilibrations with UV-Vis spectra shown in Figure S3. Addition of TEMPO-H resulted in a slight red shift in  $\lambda_{\text{max}}$  and an increase in absorbance as more TEMPO• was formed at equilibrium.

**Table S1.** Experimental setup for seven equilibration reactions between  $\text{oxo}^\bullet$  and TEMPO-H. A solution of  $\text{oxo}^\bullet$  (0.817 mL, 0.0734 M) was reacted with increasing amounts of TEMPO-H stock solution and equilibrated for 20 min.  $[\text{oxo}^\bullet]_i$  and  $[\text{TEMPO-H}]_i$  are initial concentrations of these species in solution.

| Sample | $\text{oxo}^\bullet$<br>equiv. | TEMPOH<br>equiv. | mmol<br>$\text{oxo}^\bullet$ | mmol<br>TEMPOH | Total volume<br>(mL) | $[\text{oxo}^\bullet]_i$ (mol/L) | $[\text{TEMPOH}]_i$<br>(mol/L) |
|--------|--------------------------------|------------------|------------------------------|----------------|----------------------|----------------------------------|--------------------------------|
| A      | 1.0                            | 0.33             | 0.060                        | 0.020          | 2.103                | 0.0285                           | 0.0095                         |
| B      | 1.0                            | 0.50             | 0.060                        | 0.030          | 2.289                | 0.0262                           | 0.0131                         |
| C      | 1.0                            | 0.63             | 0.060                        | 0.038          | 2.328                | 0.0258                           | 0.0161                         |
| D      | 1.0                            | 0.71             | 0.060                        | 0.043          | 2.356                | 0.0255                           | 0.0182                         |
| E      | 1.0                            | 0.83             | 0.060                        | 0.050          | 2.393                | 0.0251                           | 0.0209                         |
| F      | 1.0                            | 1.0              | 0.060                        | 0.060          | 2.444                | 0.0245                           | 0.0245                         |
| G      | 1.0                            | 1.2              | 0.060                        | 0.072          | 2.506                | 0.0239                           | 0.0287                         |

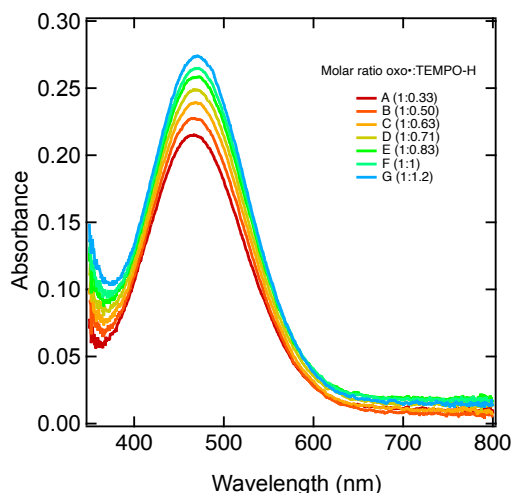

**Figure S3.** UV-Vis absorbances of  $\text{oxo}^\bullet + \text{TEMPO-H}$  reactions corrected against a hexane blank.

#### 4 Calculation of 4-oxo-TEMPO-H $\text{BDFE}_{\text{hex}}$

The concentrations of each species –  $\text{oxo}^\bullet$ ,  $\text{oxo-H}$ ,  $\text{TEMPO}^\bullet$ , and  $\text{TEMPO-H}$  – can be calculated at equilibrium using the total absorbance, the molar absorptivities of the two colored species ( $\text{oxo}^\bullet$  and  $\text{TEMPO}^\bullet$ ), and the initial concentrations of  $\text{oxo}^\bullet$  and  $\text{TEMPO-H}$ . The total absorbance at each wavelength is the sum of the absorbance of each species (eq. S2). Mass balance dictates that the sum of the concentrations of related species ( $\text{oxo}^\bullet + \text{oxo-H}$ ;  $\text{TEMPO}^\bullet + \text{TEMPO-H}$ ) at equilibrium must be equal the initial concentration of the related reactant species (eqs. S3 and S4). Additionally, the concentration of the products  $\text{oxo-H}$  and  $\text{TEMPO}^\bullet$  must be equivalent (eq. S5) in the absence of decomposition or side reactivity (of which none was observed by NMR or UV-Vis spectroscopies).

$$\text{Abs}^\lambda = l(\varepsilon_{\text{TEMPO}\cdot}^\lambda [\text{TEMPO}\cdot] + \varepsilon_{\text{oxo}\cdot}^\lambda [\text{oxo}\cdot]) \quad (\text{S2})$$

$$[\text{oxo}\cdot]_i = [\text{oxo}\cdot] + [\text{oxo-H}] \quad (\text{S3})$$

$$[\text{TEMPO-H}]_i = [\text{TEMPO-H}] + [\text{TEMPO}\cdot] \quad (\text{S4})$$

$$[\text{oxo-H}] = [\text{TEMPO}\cdot] \quad (\text{S5})$$

The system of equations above were solved for  $[\text{oxo}\cdot]$  and  $[\text{TEMPO}\cdot]$ , resulting in equations S6 and S7.

$$[\text{oxo}\cdot] = \frac{(\text{Abs}^\lambda/l) - \varepsilon_{\text{TEMPO}\cdot}^\lambda [\text{oxo}\cdot]_i}{\varepsilon_{\text{oxo}\cdot}^\lambda - \varepsilon_{\text{TEMPO}\cdot}^\lambda} \quad (\text{S6})$$

$$[\text{TEMPO}\cdot] = \frac{(\text{Abs}^\lambda/l) - \varepsilon_{\text{oxo}\cdot}^\lambda [\text{oxo}\cdot]}{\varepsilon_{\text{TEMPO}\cdot}^\lambda} \quad (\text{S7})$$

For each sample A-G, the concentrations of all species at equilibrium were calculated from the absorbance at each integer wavelength,  $\varepsilon_{\text{TEMPO}\cdot}^\lambda$  and  $\varepsilon_{\text{oxo}\cdot}^\lambda$ . A range of 450-550 nm was chosen due to the relatively large difference in  $\varepsilon$  between the species within these values. Representative data from sample B is provided in Table S2. At each wavelength (and for each sample)  $K_{\text{eq}}$  was determined using the calculated concentrations of the species at equilibrium, yielding an average  $K_{\text{eq}} = 3.9 \pm 2.0$ . This corresponds to  $\Delta G^\circ = -0.8 \pm 0.4$ . Utilizing the known  $\text{BDFE}_{\text{hex}}$  of TEMPO-H (63.4 kcal mol<sup>-1</sup>), the  $\text{BDFE}_{\text{hex}}$  of oxo-H was calculated to be  $64.2 \pm 0.4$  kcal mol<sup>-1</sup> (eq S1).

**Table S2.** UV–Vis spectroscopy data and calculated concentrations of reaction species from wavelengths 550-450 nm.

| Wavelength (nm) | $\epsilon_{\text{oxo}}$ | $\epsilon_{\text{TEMPO}}$ | Sample B, raw Abs data | Sample B, corrected Abs data | Sample B, calculated values |                       |         |           |                 |
|-----------------|-------------------------|---------------------------|------------------------|------------------------------|-----------------------------|-----------------------|---------|-----------|-----------------|
|                 |                         |                           |                        |                              | [oxo <sup>•</sup> ]         | [TEMPO <sup>•</sup> ] | [oxo-H] | [TEMPO-H] | $K_{\text{eq}}$ |
| 550             | 1.83                    | 4.52                      | 0.0765                 | 0.0809                       | 0.0167                      | 0.0111                | 0.0111  | 0.00279   | 2.66            |
| 545             | 2.06                    | 5.02                      | 0.0858                 | 0.0901                       | 0.0168                      | 0.0110                | 0.0110  | 0.00288   | 2.52            |
| 540             | 2.28                    | 5.47                      | 0.0945                 | 0.0992                       | 0.0167                      | 0.0112                | 0.0112  | 0.00273   | 2.75            |
| 535             | 2.58                    | 6.01                      | 0.105                  | 0.109                        | 0.0170                      | 0.0109                | 0.0109  | 0.00304   | 2.29            |
| 530             | 2.82                    | 6.55                      | 0.115                  | 0.119                        | 0.0169                      | 0.0110                | 0.0110  | 0.00294   | 2.44            |
| 525             | 3.03                    | 7.05                      | 0.126                  | 0.130                        | 0.0164                      | 0.0114                | 0.0114  | 0.00249   | 3.19            |
| 520             | 3.38                    | 7.59                      | 0.135                  | 0.140                        | 0.0170                      | 0.0108                | 0.0108  | 0.00308   | 2.24            |
| 515             | 3.69                    | 8.09                      | 0.147                  | 0.151                        | 0.0168                      | 0.0111                | 0.0111  | 0.00287   | 2.53            |
| 510             | 3.98                    | 8.56                      | 0.156                  | 0.160                        | 0.0170                      | 0.0108                | 0.0108  | 0.00309   | 2.23            |
| 505             | 4.30                    | 8.97                      | 0.166                  | 0.170                        | 0.0171                      | 0.0108                | 0.0108  | 0.00316   | 2.15            |
| 500             | 4.57                    | 9.39                      | 0.174                  | 0.179                        | 0.0170                      | 0.0108                | 0.0108  | 0.00308   | 2.24            |
| 495             | 4.83                    | 9.71                      | 0.183                  | 0.187                        | 0.0171                      | 0.0107                | 0.0107  | 0.00321   | 2.08            |
| 490             | 5.10                    | 9.99                      | 0.191                  | 0.195                        | 0.0170                      | 0.0109                | 0.0109  | 0.00304   | 2.30            |
| 485             | 5.32                    | 10.2                      | 0.197                  | 0.202                        | 0.0169                      | 0.0109                | 0.0109  | 0.00298   | 2.38            |
| 480             | 5.52                    | 10.3                      | 0.202                  | 0.206                        | 0.0168                      | 0.0110                | 0.0110  | 0.00290   | 2.49            |
| 475             | 5.66                    | 10.3                      | 0.206                  | 0.210                        | 0.0165                      | 0.0113                | 0.0113  | 0.00261   | 2.97            |
| 470             | 5.77                    | 10.3                      | 0.207                  | 0.211                        | 0.0167                      | 0.0112                | 0.0112  | 0.00275   | 2.73            |
| 465             | 5.83                    | 10.1                      | 0.206                  | 0.211                        | 0.0166                      | 0.0113                | 0.0113  | 0.00266   | 2.87            |
| 460             | 5.86                    | 9.91                      | 0.205                  | 0.209                        | 0.0164                      | 0.0114                | 0.0114  | 0.00248   | 3.21            |
| 455             | 5.76                    | 9.57                      | 0.203                  | 0.206                        | 0.0159                      | 0.0120                | 0.0120  | 0.00194   | 4.65            |
| 450             | 5.71                    | 9.19                      | 0.197                  | 0.201                        | 0.0157                      | 0.0122                | 0.0122  | 0.00173   | 5.48            |

## 5 References

1. Wu, A.; Masland, J.; Swartz, R. D.; Kaminsky, W.; Mayer, J. M., Synthesis and Characterization of Ruthenium Bis( $\beta$ -diketonato) Pyridine-Imidazole Complexes for Hydrogen Atom Transfer. *Inorg. Chem.* **2007**, *46* (26), 11190-11201.
2. Malievskii, A. D.; Koroteev, S. V.; Shapiro, A. B., Kinetics and thermodynamics of hydrogen atom exchange reactions in sterically hindered hydroxylamine-nitroxyl radical systems. *Kinet. Catal.* **2005**, *46* (6), 812-820.
